# Supplementary material for: Study on the Interactions of Cyclins with CDKs Involved in Auxin Signal during Leaf Development by WGCNA in Populus alba
Source: MDPI journal article supplement (doi:10.3390/ijms241713445), 2023-08-30
Supplement: s1 [file s1]

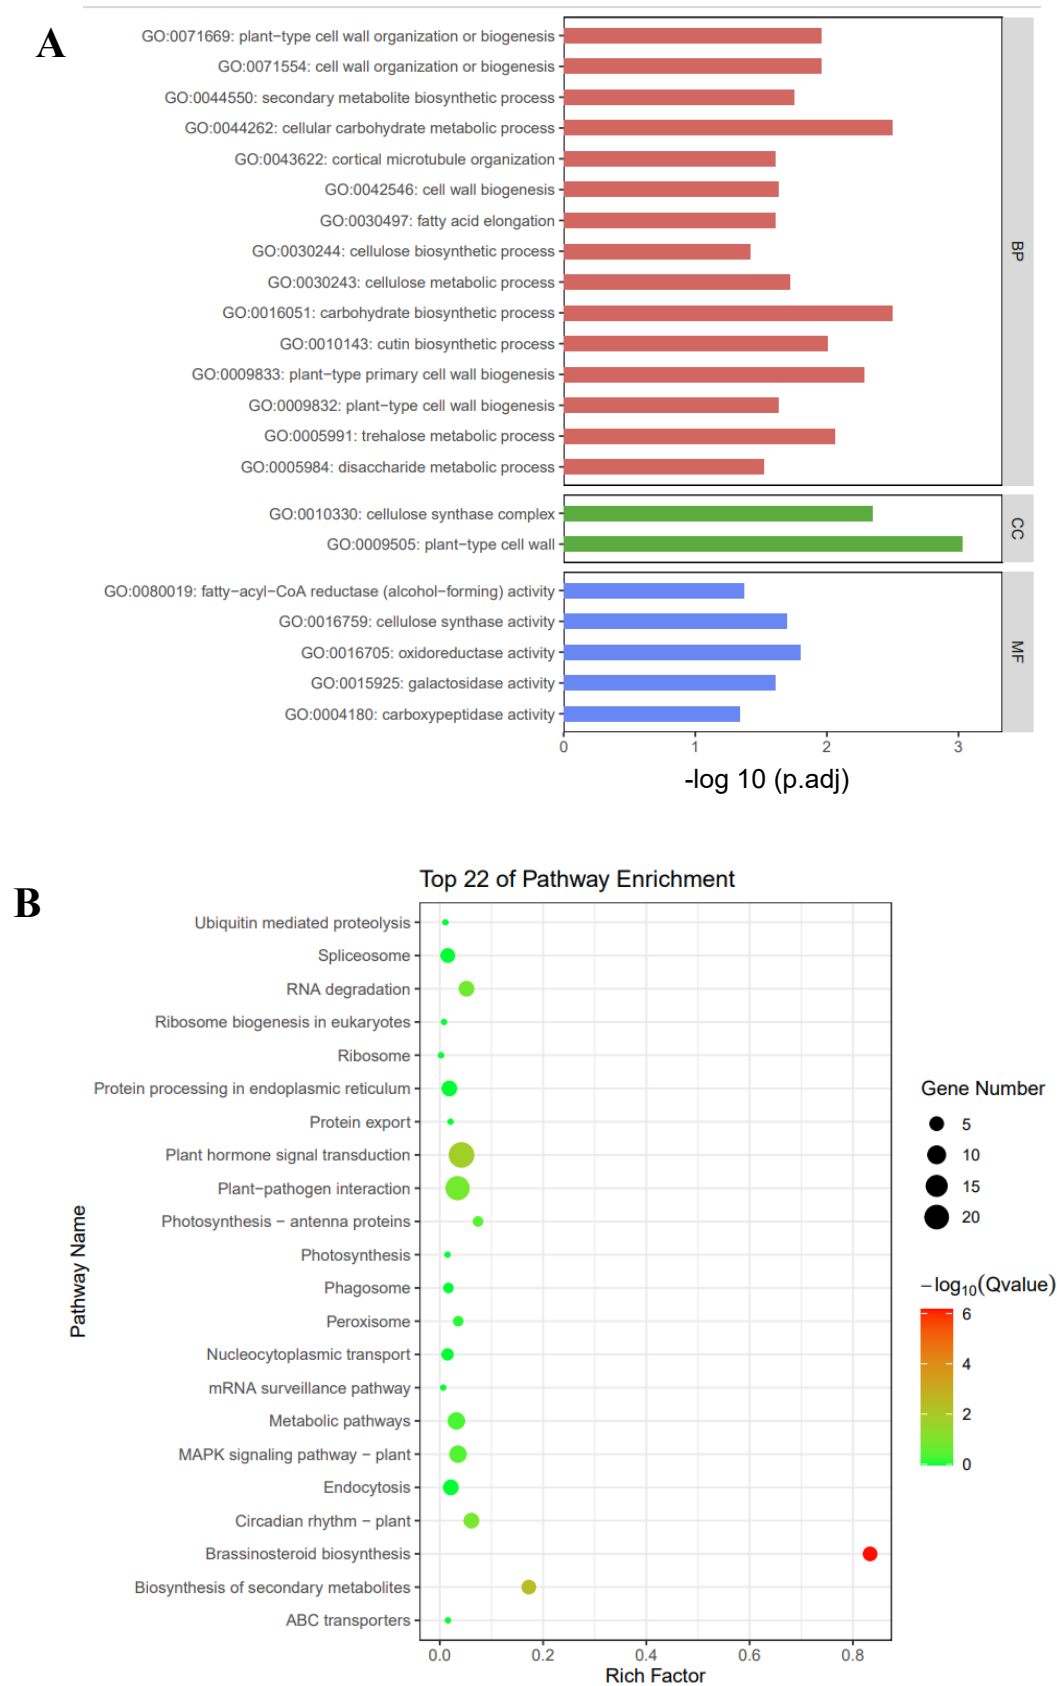

**Figure S5.** The GO and KEGG enrichment of the DEGs by IBA treatment. **A** GO enrichment of DEGs. **B** KEGG enrichment of DEGs.
