# Supplementary material for: Study on the Interactions of Cyclins with CDKs Involved in Auxin Signal during Leaf Development by WGCNA in Populus alba
Source: MDPI journal article supplement (doi:10.3390/ijms241713445), 2023-08-30
Supplement: s1 [file s1]

|              | Auxin  | MeJA        | GA         | SA          | ABA         | Light      |       |          |             |      |       |            |           |           |            | Division   | Zein  | Flavonoid | Cir       | Abiotic and biotic stresses |          |         |         |           |      |           |     |       |                 |       |     |     |   |
|--------------|--------|-------------|------------|-------------|-------------|------------|-------|----------|-------------|------|-------|------------|-----------|-----------|------------|------------|-------|-----------|-----------|-----------------------------|----------|---------|---------|-----------|------|-----------|-----|-------|-----------------|-------|-----|-----|---|
|              | AUXREs | TGA-element | AuxRR-core | CGTCA-motif | TGACG-motif | GARE-motif | P-box | TATC-box | TCA-element | ABRE | Box 4 | GATA-motif | TCT-motif | GT1-motif | ATCT-motif | TCCC-motif | I-box | AE-box    | AT1-motif | MRE                         | MSA-like | CAT-box | O2-site | CCAAT-box | MBSI | circadian | ARE | W box | TC-rich repeats | G-box | MBS | LTR |   |
| PoalbCYCA1;1 | 0      | 0           | 0          | 1           | 1           | 0          | 1     | 0        | 2           | 1    | 1     | 0          | 1         | 1         | 0          | 0          | 1     | 2         | 0         | 1                           | 2        | 0       | 1       | 1         | 0    | 0         | 3   | 0     | 1               | 2     | 1   | 0   |   |
| PoalbCYCA1;2 | 2      | 0           | 0          | 2           | 2           | 0          | 1     | 0        | 1           | 2    | 0     | 0          | 0         | 2         | 0          | 0          | 0     | 2         | 0         | 0                           | 3        | 0       | 1       | 1         | 0    | 0         | 4   | 0     | 0               | 3     | 0   | 0   |   |
| PoalbCYCA2;1 | 2      | 1           | 0          | 0           | 0           | 0          | 0     | 0        | 0           | 4    | 1     | 0          | 0         | 2         | 1          | 1          | 0     | 1         | 0         | 0                           | 0        | 0       | 0       | 0         | 0    | 0         | 1   | 0     | 0               | 3     | 1   | 3   |   |
| PoalbCYCA2;2 | 1      | 3           | 0          | 0           | 0           | 0          | 1     | 0        | 0           | 3    | 3     | 0          | 1         | 2         | 0          | 1          | 0     | 1         | 0         | 0                           | 0        | 0       | 2       | 0         | 0    | 0         | 2   | 0     | 1               | 1     | 1   | 1   |   |
| PoalbCYCA2;3 | 0      | 1           | 0          | 2           | 2           | 0          | 0     | 0        | 4           | 0    | 0     | 0          | 1         | 0         | 0          | 0          | 0     | 3         | 0         | 0                           | 0        | 0       | 1       | 0         | 0    | 0         | 7   | 0     | 0               | 1     | 0   | 1   |   |
| PoalbCYCA2;4 | 0      | 1           | 0          | 1           | 1           | 0          | 1     | 0        | 2           | 1    | 0     | 2          | 1         | 0         | 0          | 0          | 1     | 2         | 0         | 0                           | 0        | 2       | 0       | 0         | 0    | 0         | 1   | 1     | 2               | 0     | 1   | 1   |   |
| PoalbCYCA3;1 | 0      | 0           | 0          | 0           | 0           | 1          | 0     | 0        | 1           | 2    | 0     | 1          | 3         | 2         | 0          | 1          | 2     | 0         | 1         | 1                           | 0        | 0       | 0       | 0         | 0    | 0         | 1   | 2     | 0               | 2     | 0   | 0   |   |
| PoalbCYCA3;2 | 0      | 0           | 0          | 0           | 0           | 0          | 0     | 0        | 1           | 2    | 8     | 0          | 0         | 1         | 0          | 0          | 1     | 0         | 0         | 0                           | 0        | 0       | 1       | 1         | 0    | 0         | 1   | 1     | 3               | 1     | 2   | 0   |   |
| PoalbCYCA3;3 | 0      | 0           | 0          | 1           | 1           | 0          | 0     | 0        | 1           | 2    | 7     | 0          | 0         | 3         | 0          | 1          | 1     | 0         | 1         | 0                           | 0        | 1       | 1       | 0         | 0    | 0         | 1   | 2     | 1               | 1     | 2   | 0   |   |
| PoalbCYCB1;1 | 1      | 0           | 0          | 0           | 0           | 0          | 1     | 1        | 0           | 2    | 4     | 1          | 2         | 0         | 0          | 1          | 1     | 0         | 0         | 0                           | 2        | 0       | 0       | 2         | 0    | 0         | 1   | 1     | 0               | 1     | 0   | 0   |   |
| PoalbCYCB1;2 | 0      | 0           | 0          | 0           | 0           | 0          | 0     | 0        | 0           | 1    | 6     | 0          | 1         | 0         | 1          | 1          | 1     | 1         | 1         | 1                           | 2        | 1       | 0       | 2         | 0    | 0         | 2   | 0     | 1               | 2     | 0   | 0   |   |
| PoalbCYCB1;3 | 1      | 0           | 0          | 3           | 3           | 0          | 1     | 0        | 0           | 0    | 6     | 1          | 0         | 3         | 0          | 1          | 0     | 0         | 2         | 1                           | 2        | 1       | 0       | 2         | 0    | 0         | 5   | 2     | 0               | 0     | 0   | 0   |   |
| PoalbCYCB1;4 | 0      | 0           | 0          | 1           | 1           | 0          | 0     | 0        | 2           | 3    | 4     | 1          | 1         | 2         | 0          | 0          | 0     | 1         | 0         | 2                           | 2        | 0       | 2       | 1         | 0    | 0         | 4   | 1     | 3               | 4     | 0   | 1   |   |
| PoalbCYCB2;1 | 2      | 1           | 0          | 1           | 1           | 0          | 1     | 0        | 1           | 1    | 2     | 0          | 1         | 1         | 1          | 1          | 0     | 0         | 0         | 0                           | 2        | 0       | 0       | 3         | 0    | 0         | 1   | 0     | 0               | 1     | 0   | 0   |   |
| PoalbCYCB2;2 | 1      | 0           | 0          | 2           | 2           | 0          | 1     | 0        | 0           | 1    | 3     | 1          | 0         | 2         | 0          | 2          | 2     | 1         | 0         | 1                           | 1        | 0       | 0       | 2         | 0    | 0         | 4   | 0     | 0               | 1     | 1   | 0   |   |
| PoalbCYCB2;3 | 1      | 0           | 0          | 1           | 1           | 0          | 0     | 0        | 3           | 1    | 2     | 1          | 0         | 2         | 1          | 0          | 0     | 2         | 0         | 0                           | 1        | 1       | 0       | 2         | 0    | 0         | 2   | 1     | 1               | 0     | 0   | 0   |   |
| PoalbCYCB3;1 | 1      | 0           | 0          | 2           | 2           | 0          | 0     | 0        | 1           | 2    | 5     | 4          | 1         | 2         | 0          | 0          | 0     | 1         | 0         | 1                           | 0        | 0       | 0       | 1         | 0    | 0         | 2   | 0     | 1               | 2     | 0   | 0   |   |
| PoalbCYCC1;1 | 0      | 0           | 0          | 0           | 0           | 1          | 2     | 1        | 0           | 0    | 3     | 1          | 1         | 1         | 1          | 0          | 2     | 0         | 0         | 0                           | 0        | 0       | 0       | 1         | 0    | 0         | 2   | 1     | 1               | 0     | 1   | 0   |   |
| PoalbCYCC1;2 | 2      | 1           | 0          | 1           | 1           | 0          | 0     | 0        | 0           | 1    | 4     | 0          | 0         | 5         | 0          | 0          | 0     | 0         | 2         | 0                           | 0        | 0       | 0       | 0         | 0    | 0         | 5   | 2     | 0               | 0     | 2   | 3   |   |
| PoalbCYCD1;1 | 0      | 0           | 0          | 0           | 0           | 0          | 0     | 0        | 1           | 2    | 3     | 0          | 3         | 2         | 0          | 0          | 0     | 1         | 0         | 0                           | 0        | 1       | 1       | 1         | 0    | 0         | 0   | 0     | 0               | 4     | 1   | 0   |   |
| PoalbCYCD1;2 | 1      | 0           | 0          | 0           | 0           | 0          | 0     | 0        | 0           | 0    | 2     | 0          | 0         | 3         | 0          | 0          | 0     | 2         | 1         | 1                           | 0        | 0       | 0       | 0         | 0    | 0         | 3   | 2     | 0               | 0     | 1   | 1   |   |
| PoalbCYCD1;3 | 2      | 0           | 0          | 0           | 0           | 0          | 0     | 0        | 0           | 5    | 1     | 0          | 0         | 3         | 0          | 1          | 0     | 1         | 0         | 0                           | 0        | 0       | 0       | 1         | 0    | 0         | 2   | 2     | 0               | 5     | 1   | 1   |   |
| PoalbCYCD1;4 | 2      | 0           | 0          | 1           | 1           | 0          | 0     | 0        | 0           | 2    | 3     | 2          | 2         | 2         | 0          | 1          | 1     | 4         | 2         | 0                           | 0        | 2       | 0       | 1         | 0    | 0         | 2   | 2     | 0               | 2     | 0   | 0   |   |
| PoalbCYCD1;5 | 1      | 1           | 0          | 2           | 2           | 0          | 0     | 0        | 0           | 2    | 3     | 0          | 0         | 5         | 0          | 1          | 0     | 1         | 0         | 2                           | 0        | 1       | 0       | 0         | 0    | 0         | 4   | 2     | 0               | 3     | 0   | 2   |   |
| PoalbCYCD1;6 | 0      | 0           | 0          | 2           | 2           | 0          | 1     | 0        | 1           | 1    | 2     | 0          | 3         | 1         | 1          | 0          | 0     | 0         | 0         | 0                           | 0        | 0       | 1       | 0         | 0    | 0         | 0   | 0     | 0               | 1     | 1   | 0   |   |
| PoalbCYCD2;1 | 0      | 0           | 0          | 1           | 1           | 0          | 1     | 0        | 0           | 0    | 3     | 1          | 0         | 0         | 0          | 1          | 0     | 0         | 1         | 0                           | 0        | 0       | 0       | 0         | 0    | 0         | 1   | 0     | 0               | 0     | 0   | 2   |   |
| PoalbCYCD2;2 | 0      | 0           | 0          | 1           | 1           | 0          | 0     | 1        | 0           | 1    | 4     | 1          | 0         | 6         | 0          | 0          | 0     | 0         | 2         | 0                           | 0        | 0       | 1       | 0         | 0    | 0         | 3   | 0     | 0               | 1     | 1   | 1   |   |
| PoalbCYCD3;1 | 2      | 1           | 0          | 2           | 2           | 0          | 0     | 0        | 3           | 0    | 1     | 0          | 1         | 1         | 0          | 0          | 0     | 0         | 1         | 0                           | 0        | 2       | 0       | 0         | 0    | 0         | 3   | 1     | 1               | 1     | 1   | 2   |   |
| PoalbCYCD3;2 | 2      | 0           | 0          | 0           | 0           | 0          | 0     | 0        | 0           | 2    | 1     | 1          | 1         | 1         | 0          | 0          | 1     | 0         | 1         | 1                           | 2        | 0       | 0       | 0         | 0    | 0         | 3   | 0     | 0               | 2     | 1   | 1   |   |
| PoalbCYCD3;3 | 1      | 0           | 0          | 3           | 3           | 0          | 0     | 0        | 1           | 1    | 7     | 1          | 0         | 0         | 1          | 1          | 0     | 0         | 1         | 0                           | 0        | 1       | 0       | 0         | 0    | 0         | 1   | 1     | 0               | 0     | 0   | 0   |   |
| PoalbCYCD3;4 | 0      | 0           | 0          | 0           | 0           | 0          | 0     | 0        | 0           | 3    | 6     | 1          | 0         | 3         | 0          | 1          | 0     | 0         | 1         | 0                           | 0        | 0       | 0       | 0         | 0    | 0         | 1   | 0     | 0               | 4     | 0   | 0   |   |
| PoalbCYCD3;5 | 2      | 1           | 0          | 2           | 2           | 0          | 0     | 0        | 0           | 1    | 3     | 1          | 2         | 2         | 0          | 0          | 1     | 0         | 1         | 1                           | 0        | 0       | 0       | 1         | 0    | 0         | 1   | 0     | 1               | 1     | 0   | 0   |   |
| PoalbCYCD5;1 | 1      | 0           | 0          | 0           | 0           | 0          | 0     | 0        | 0           | 3    | 4     | 2          | 1         | 5         | 0          | 0          | 1     | 2         | 0         | 1                           | 0        | 1       | 0       | 1         | 0    | 1         | 2   | 0     | 1               | 3     | 0   | 0   |   |
| PoalbCYCD5;2 | 3      | 1           | 0          | 3           | 3           | 1          | 0     | 1        | 0           | 2    | 4     | 0          | 0         | 2         | 0          | 0          | 0     | 1         | 0         | 0                           | 0        | 0       | 0       | 0         | 0    | 0         | 0   | 1     | 2               | 0     | 4   | 0   | 0 |
| PoalbCYCD5;3 | 0      | 0           | 0          | 2           | 2           | 0          | 0     | 0        | 0           | 1    | 2     | 2          | 0         | 0         | 0          | 1          | 0     | 0         | 0         | 1                           | 0        | 1       | 3       | 0         | 0    | 0         | 1   | 0     | 0               | 2     | 1   | 0   |   |
| PoalbCYD6;1  | 1      | 0           | 0          | 0           | 0           | 1          | 2     | 0        | 0           | 0    | 6     | 0          | 0         | 5         | 0          | 0          | 1     | 2         | 1         | 0                           | 0        | 0       | 0       | 0         | 0    | 0         | 1   | 2     | 0               | 1     | 0   | 1   |   |
| PoalbCYD6;2  | 0      | 0           | 0          | 1           | 1           | 0          | 1     | 0        | 1           | 0    | 4     | 1          | 0         | 3         | 0          | 1          | 0     | 0         | 0         | 0                           | 0        | 0       | 0       | 0         | 0    | 0         | 3   | 1     | 0               | 0     | 1   | 0   |   |
| PoalbCYD6;3  | 0      | 0           | 0          | 0           | 0           | 0          | 2     | 0        | 1           | 0    | 5     | 1          | 1         | 3         | 0          | 0          | 0     | 1         | 0         | 0                           | 0        | 0       | 0       | 2         | 0    | 0         | 3   | 4     | 0               | 0     | 0   | 0   |   |
| PoalbCYD6;4  | 1      | 0           | 0          | 0           | 0           | 0          | 2     | 1        | 0           | 3    | 6     | 0          | 2         | 0         | 0          | 0          | 0     | 1         | 0         | 0                           | 0        | 0       | 0       | 0         | 0    | 0         | 1   | 2     | 3               | 2     | 0   | 0   |   |
| PoalbCYD6;5  | 0      | 0           | 0          | 0           | 0           | 0          | 0     | 0        | 0           | 6    | 3     | 0          | 0         | 2         | 0          | 0          | 0     | 2         | 0         | 2                           | 0        | 2       | 1       | 1         | 0    | 0         | 3   | 1     | 0               | 4     | 0   | 0   |   |
| PoalbCYD7;1  | 0      | 0           | 0          | 0           | 0           | 0          | 0     | 0        | 0           | 8    | 6     | 1          | 1         | 2         | 0          | 0          | 1     | 0         | 0         | 0                           | 1        | 0       | 0       | 0         | 0    | 0         | 0   | 0     | 1               | 0     | 9   | 0   | 0 |
| PoalbCYCH1;1 | 0      | 0           | 0          | 0           | 0           | 0          | 1     | 0        | 0           | 3    | 5     | 1          | 2         | 4         | 1          | 0          | 0     | 0         | 1         | 0                           | 0        | 0       | 1       | 0         | 0    | 0         | 1   | 1     | 0               | 2     | 0   | 0   |   |
| PoalbCYCL1;1 | 0      | 0           | 0          | 1           | 1           | 0          | 0     | 1        | 1           | 4    | 4     | 2          | 0         | 4         | 3          | 0          | 0     | 0         | 1         | 0                           | 0        | 0       | 0       | 0         | 0    | 0         | 3   | 0     | 0               | 7     | 0   | 2   |   |
| PoalbCYCT1;1 | 1      | 0           | 0          | 1           | 1           | 0          | 1     | 0        | 0           | 1    | 4     | 2          | 0         | 1         | 1          | 0          | 0     | 1         | 0         | 0                           | 1        | 0       | 0       | 0         | 0    | 0         | 5   | 0     | 2               | 1     | 0   | 0   |   |
| PoalbCYCT1;2 | 0      | 0           | 0          | 2           | 2           | 0          | 0     | 0        | 1           | 2    | 2     | 1          | 0         | 3         | 1          | 0          | 2     | 1         | 0         | 0                           | 0        | 0       | 0       | 1         | 0    | 0         | 3   | 1     | 0               | 2     | 0   | 1   |   |
| PoalbCYCT1;3 | 1      | 0           | 0          | 2           | 2           | 0          | 1     | 0        | 0           | 6    | 6     | 2          | 1         | 1         | 0          | 0          | 0     | 2         | 0         | 1                           | 1        | 0       | 0       | 1         | 0    | 0         | 1   | 0     | 0               | 7     | 0   | 2   |   |
| PoalbCYCT1;4 | 0      | 1           | 0          | 2           | 2           | 1          | 0     | 0        | 1           | 2    | 4     | 0          | 2         | 1         | 0          | 0          | 1     | 0         | 0         | 0                           | 0        | 0       | 1       | 0         | 0    | 0         | 5   | 0     | 0               | 2     | 0   | 1   |   |
| PoalbCYCT1;5 | 3      | 1           | 0          | 0           | 0           | 2          | 0     | 1        | 0           | 1    | 1     | 0          | 2         | 4         | 0          | 0          | 1     | 0         | 0         | 1                           | 2        | 0       | 1       | 1         | 0    | 0         | 3   | 1     | 2               | 1     | 0   | 0   |   |
| PoalbCYCT1;6 | 2      | 2           | 0          | 0           | 0           | 0          | 0     | 0        | 0           | 0    | 2     | 0          | 1         | 3         | 1          | 0          | 1     | 1         | 0         | 2                           | 0        | 0       | 1       | 1         | 0    | 0         | 0   | 2     | 1               | 0     | 2   | 0   |   |
| PoalbCYCU1;1 | 0      | 0           | 1          | 1           | 1           | 0          | 0     | 0        | 0           | 4    | 1     | 0          | 0         | 3         | 0          | 0          | 0     | 0         | 1         | 0                           | 1        | 2       | 0       | 0         | 0    | 0         | 0   | 1     | 0               | 5     | 0   | 1   |   |
| PoalbCYCU2;1 | 1      | 1           | 1          | 3           | 3           | 0          | 0     | 0        | 0           | 5    | 5     | 0          | 1         | 2         | 0          | 2          | 0     | 0         | 1         | 0                           | 0        | 0       | 0       | 0         | 0    | 0         | 1   | 0     | 0               | 6     | 1   | 1   |   |
| PoalbCYCU2;2 | 3      | 1           | 0          | 1           | 1           | 1          | 0     | 0        | 3           | 0    | 11    | 0          | 0         | 0         | 0          | 1          | 0     | 0         | 0         | 0                           | 0        | 0       | 1       | 0         | 0    | 0         | 4   | 0     | 0               | 0     | 0   | 0   |   |
| PoalbCYCU3;1 | 1      | 0           | 0          | 0           | 0           | 1          | 0     | 0        | 1           | 2    | 2     | 1          | 1         | 2         | 0          | 2          | 1     | 0         | 0         | 0                           | 0        | 0       | 0       | 0         | 0    | 0         | 1   | 1     | 2               | 0     | 2   | 0   |   |
| PoalbCYCU3;2 | 1      | 0           | 0          | 2           | 2           | 0          | 0     | 0        | 0           | 0    | 3     | 1          | 0         | 2         | 0          | 0          | 0     | 1         | 0         | 3                           | 0        | 0       | 0       | 0         | 0    | 0         | 2   | 2     | 0               | 0     | 2   | 0   |   |
| PoalbCYCU3;3 | 0      | 1           | 0          | 0           | 0           | 1          | 1     | 1        | 0           | 1    | 4     | 0          | 3         | 3         | 0          | 0          | 0     | 0         | 0         | 0                           | 0        | 0       | 1       | 0         | 0    | 0         | 0   | 0     | 0               | 1     | 2   | 1   |   |
| PoalbCYCU3;4 | 0      | 1           | 0          | 0           | 0           | 0          | 0     | 0        | 1           | 4    | 5     | 1          | 1         | 3         | 0          | 0          | 0     | 1         | 0         | 0                           | 0        | 0       | 0       | 0         | 0    | 0         | 3   | 0     | 1               | 5     | 1   | 0   |   |
| PoalbCYCU4;1 | 2      | 0           | 0          | 0           | 0           | 1          | 1     | 0        | 0           | 2    | 5     | 0          | 0         | 6         | 0          | 0          | 0     | 0         | 0         |                             |          |         |         |           |      |           |     |       |                 |       |     |     |   |
