# Supplementary material for: Study on the Interactions of Cyclins with CDKs Involved in Auxin Signal during Leaf Development by WGCNA in Populus alba
Source: MDPI journal article supplement (doi:10.3390/ijms241713445), 2023-08-30
Supplement: s1 [file s1]

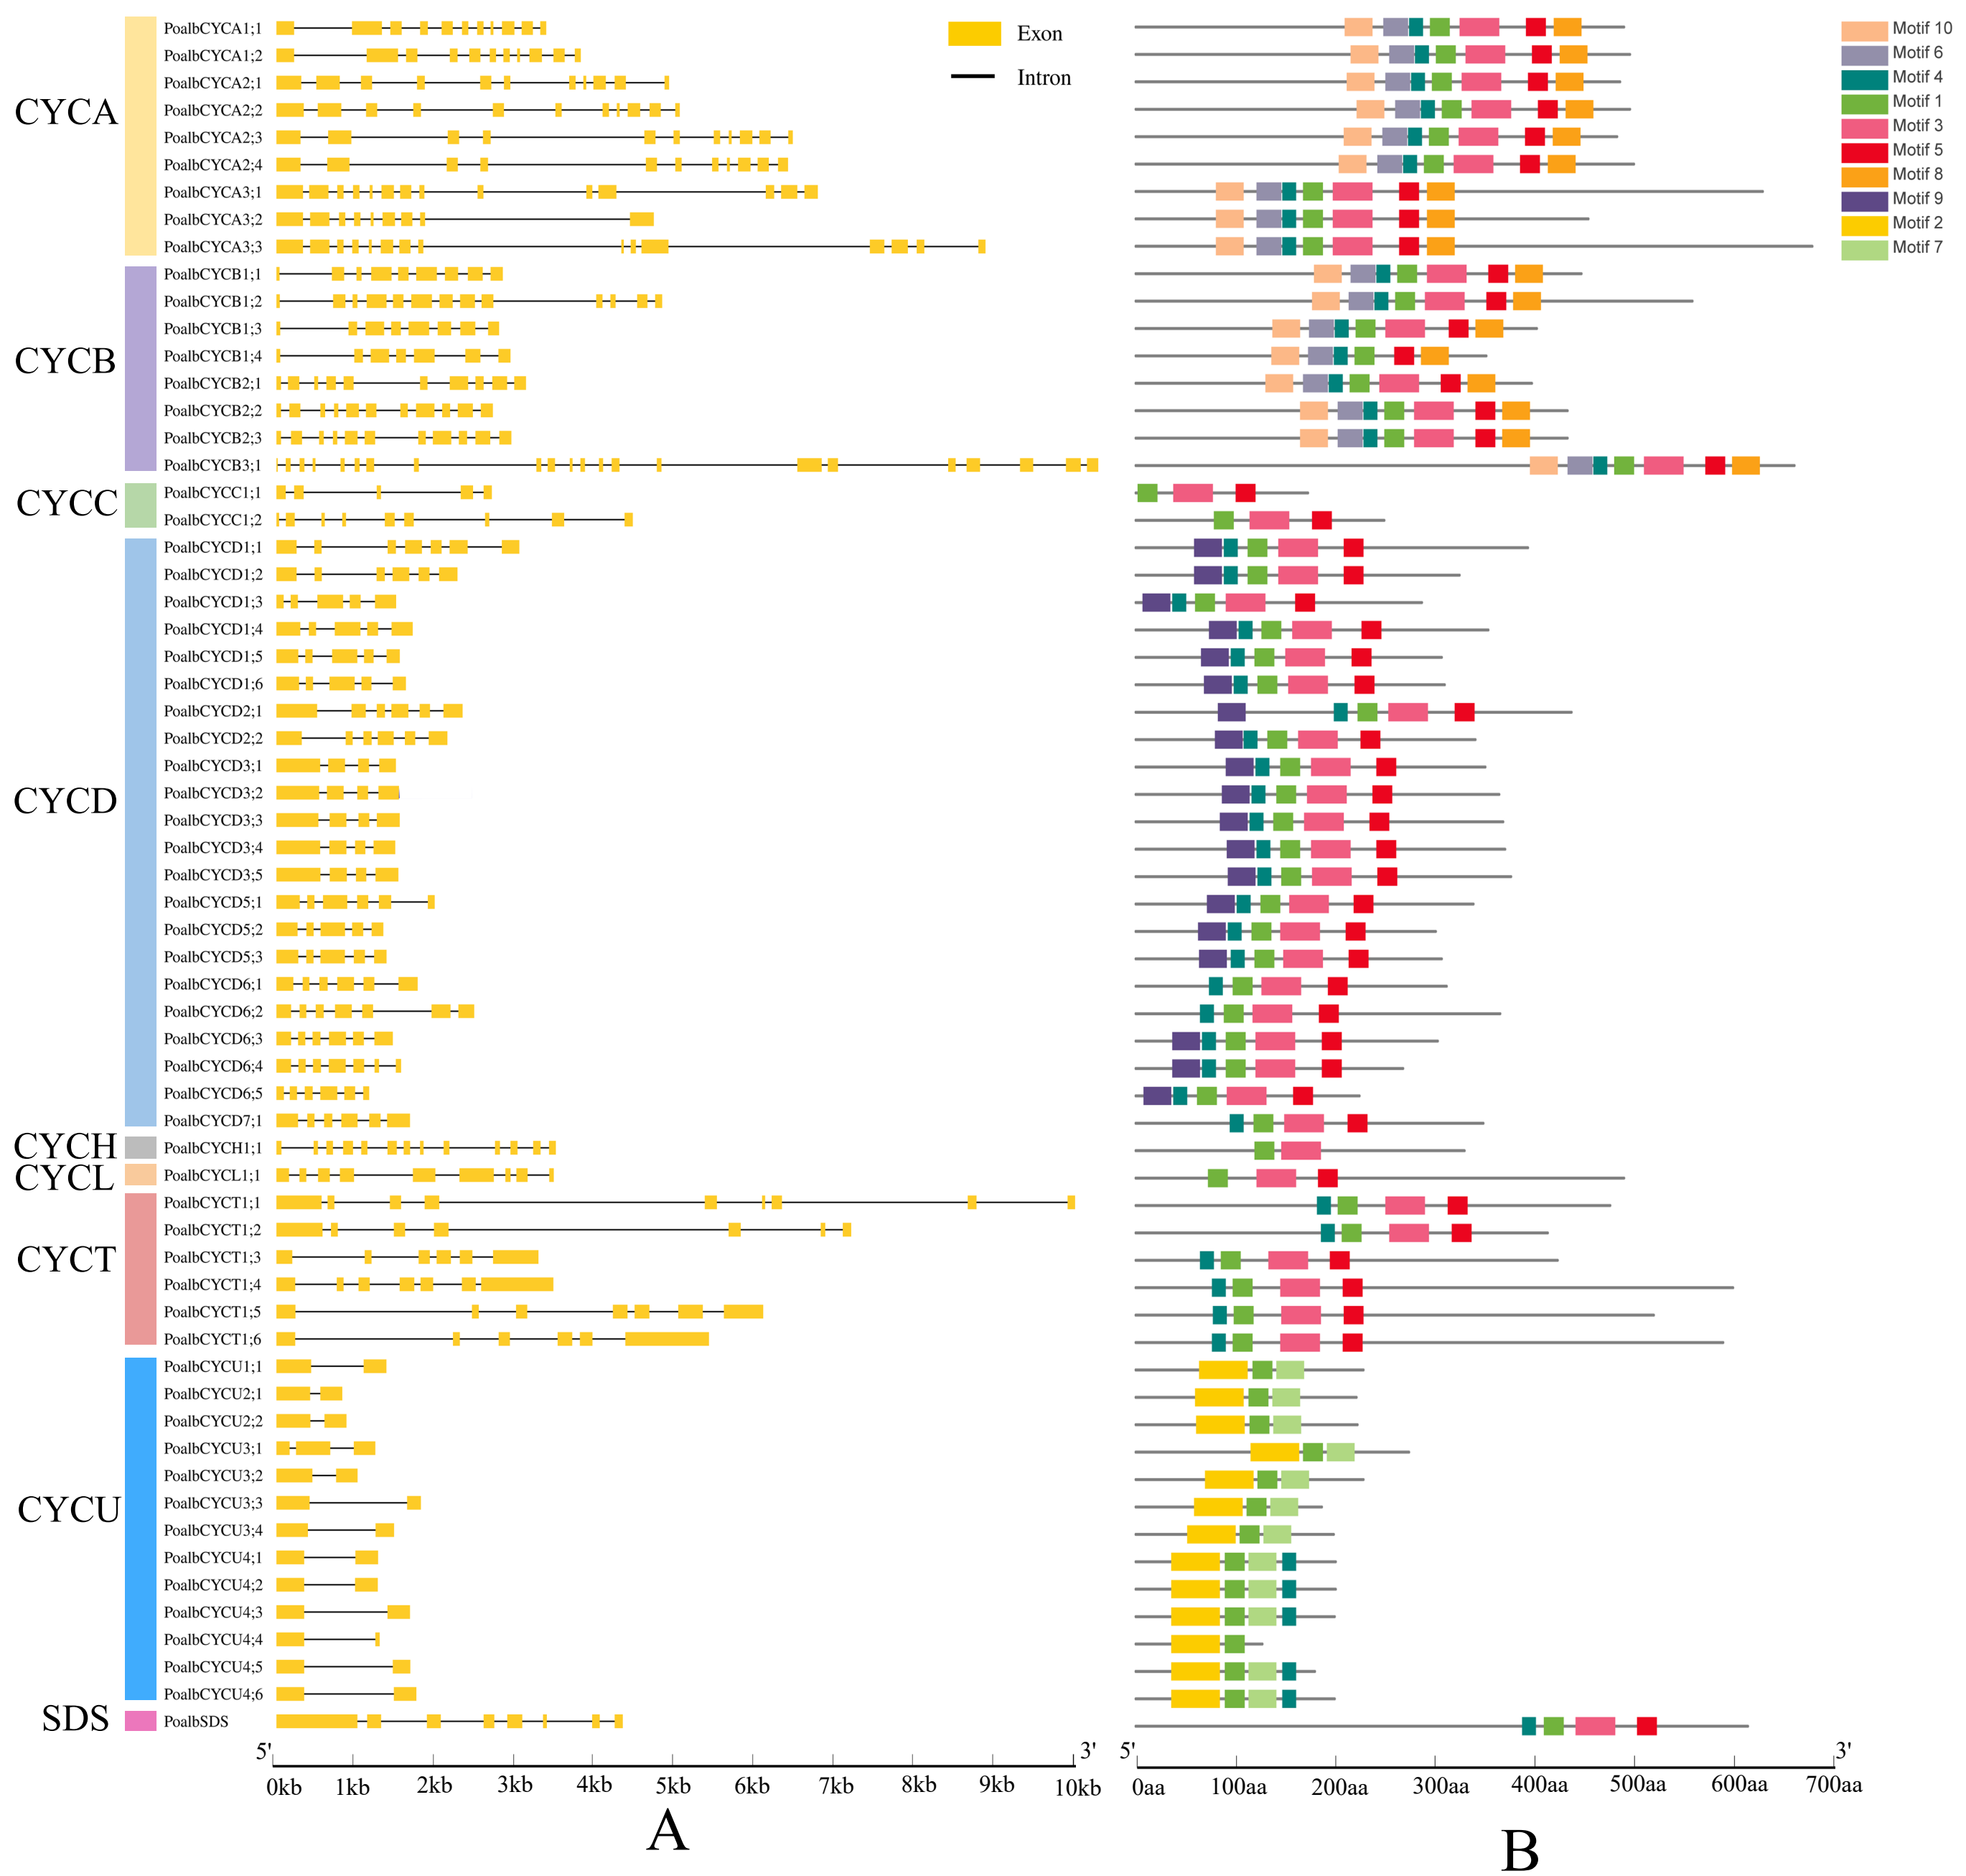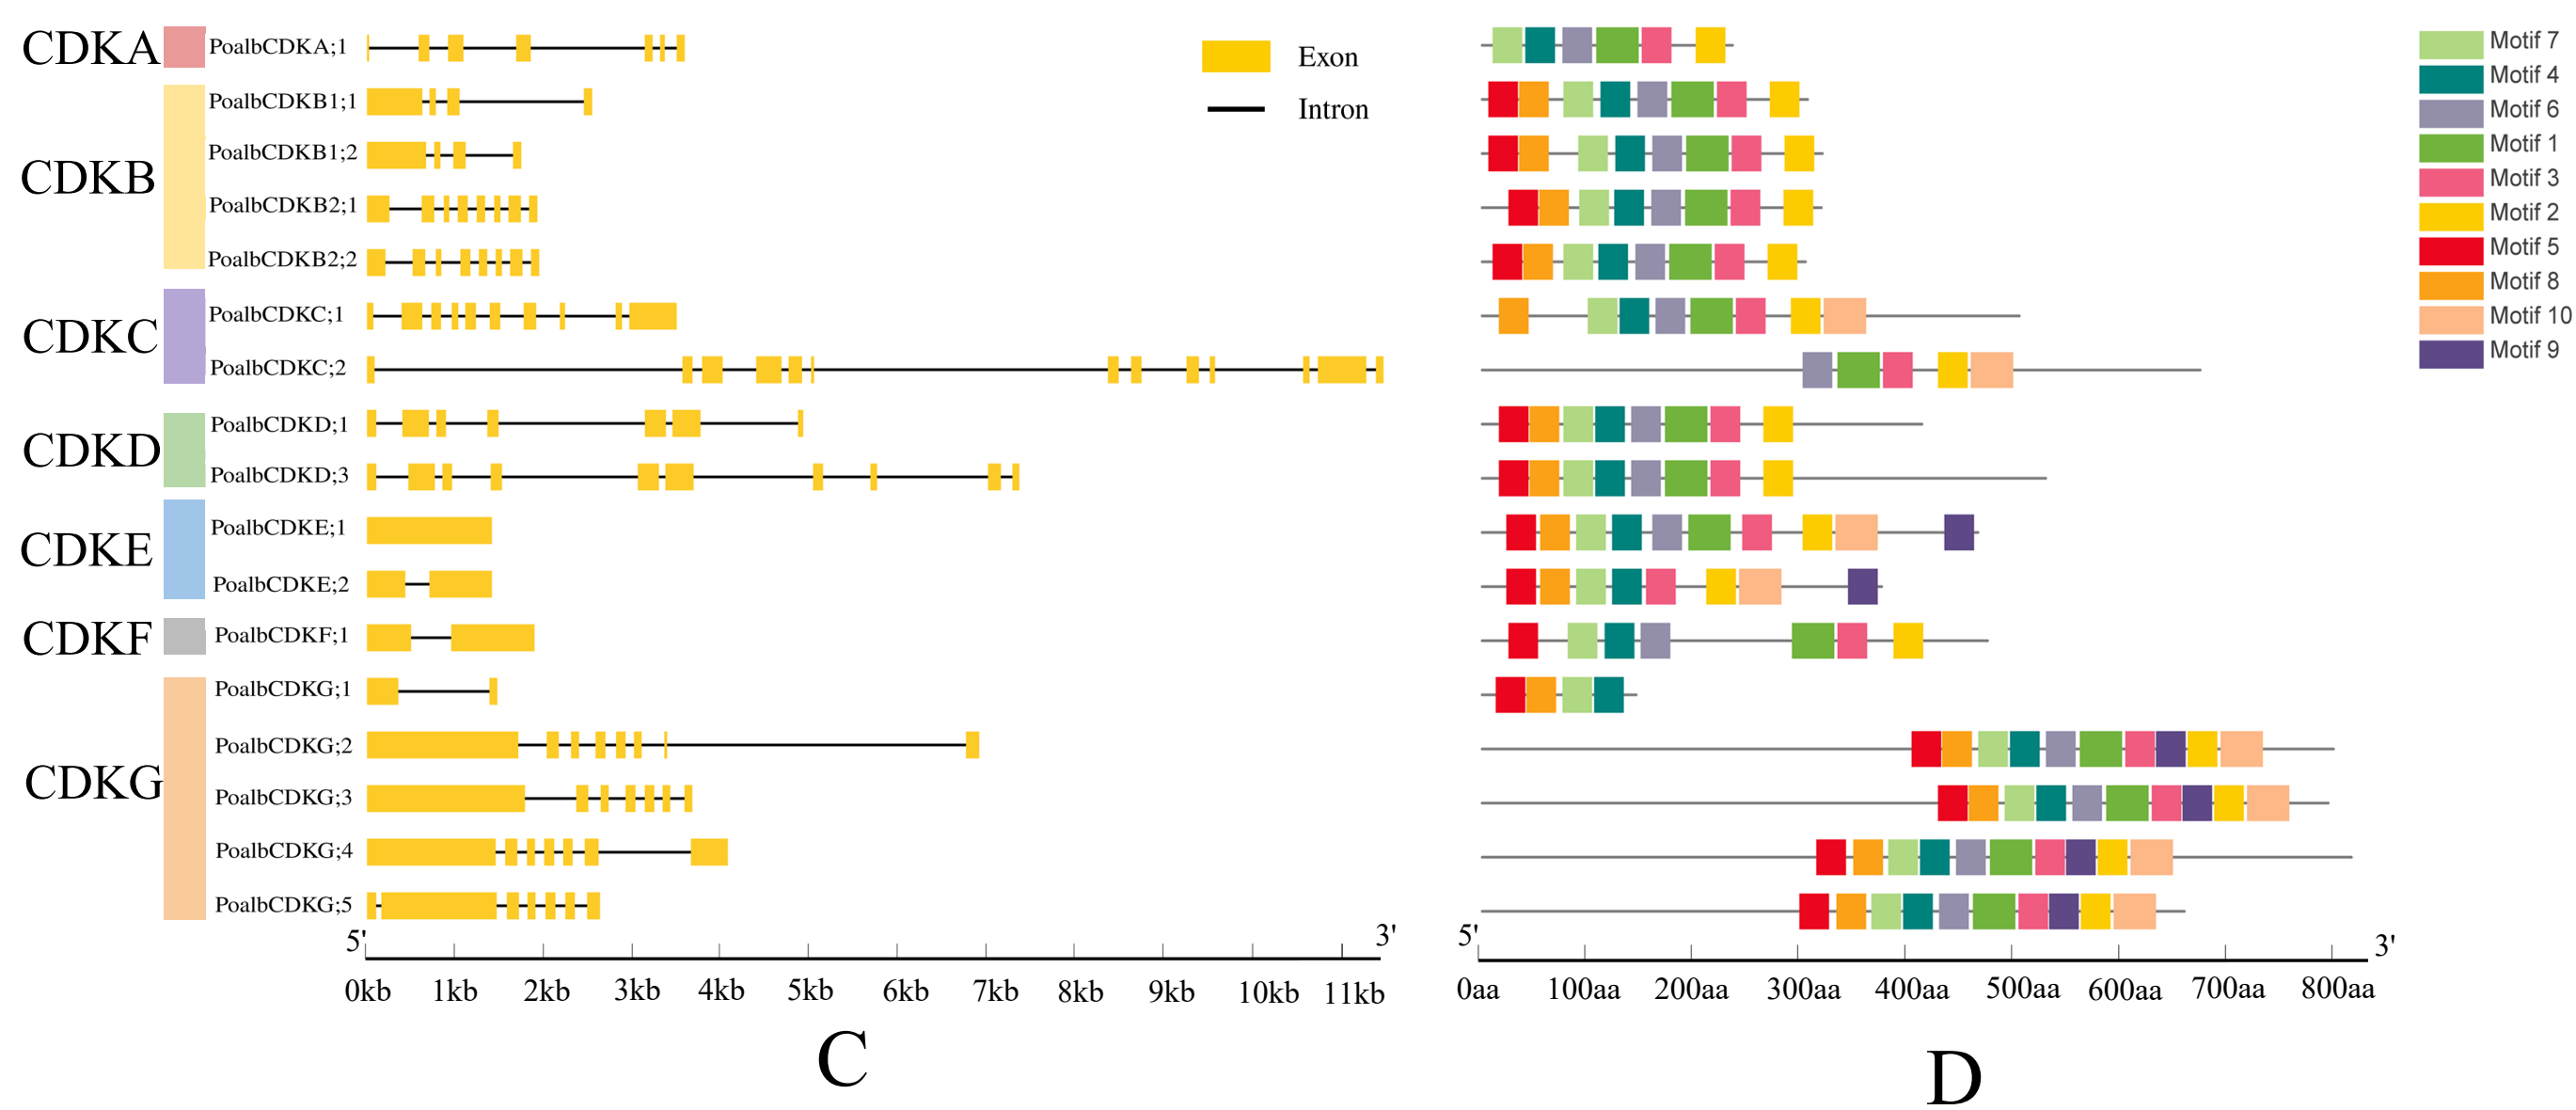

**Figure. S1** Gene structures and conserved motifs. **A** cyclin genes structures. **B** cyclin conserved moifs. **C** CDK genes structures. **D** CDK conserved moifs.
