# Supplementary material for: Study on the Interactions of Cyclins with CDKs Involved in Auxin Signal during Leaf Development by WGCNA in Populus alba
Source: MDPI journal article supplement (doi:10.3390/ijms241713445), 2023-08-30
Supplement: s1 [file s1]

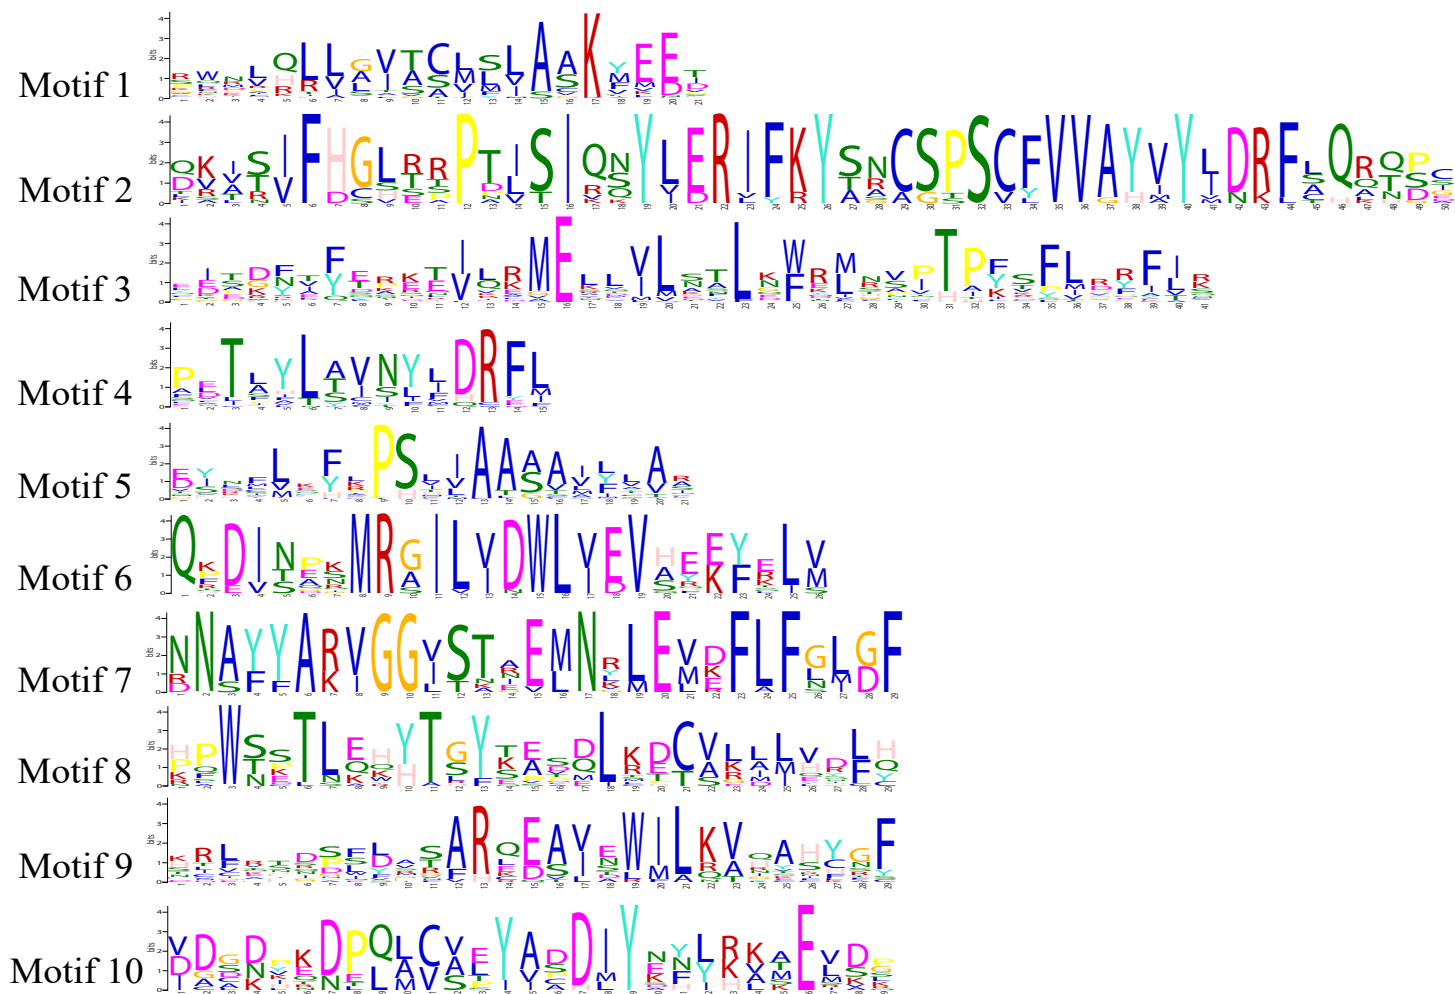

A

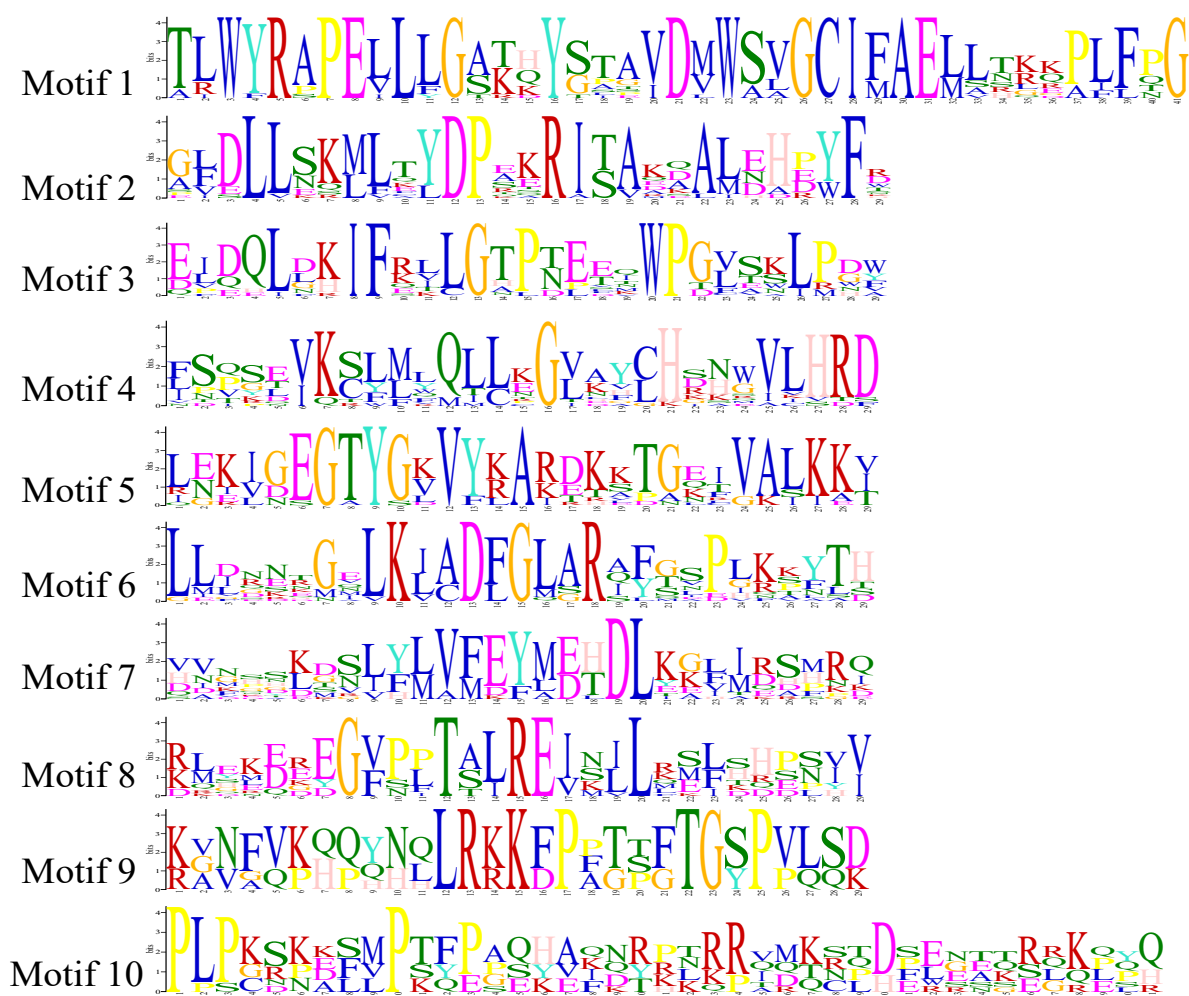

B

**Figure S2.** Conserved motifs in cyclins and CDKs.

**A** 10 types conserved motifs in cyclins. **B** 10 types conserved motifs in CDKs
