# Supplementary material for: Study on the Interactions of Cyclins with CDKs Involved in Auxin Signal during Leaf Development by WGCNA in Populus alba
Source: MDPI journal article supplement (doi:10.3390/ijms241713445), 2023-08-30
Supplement: s1 [file s1]

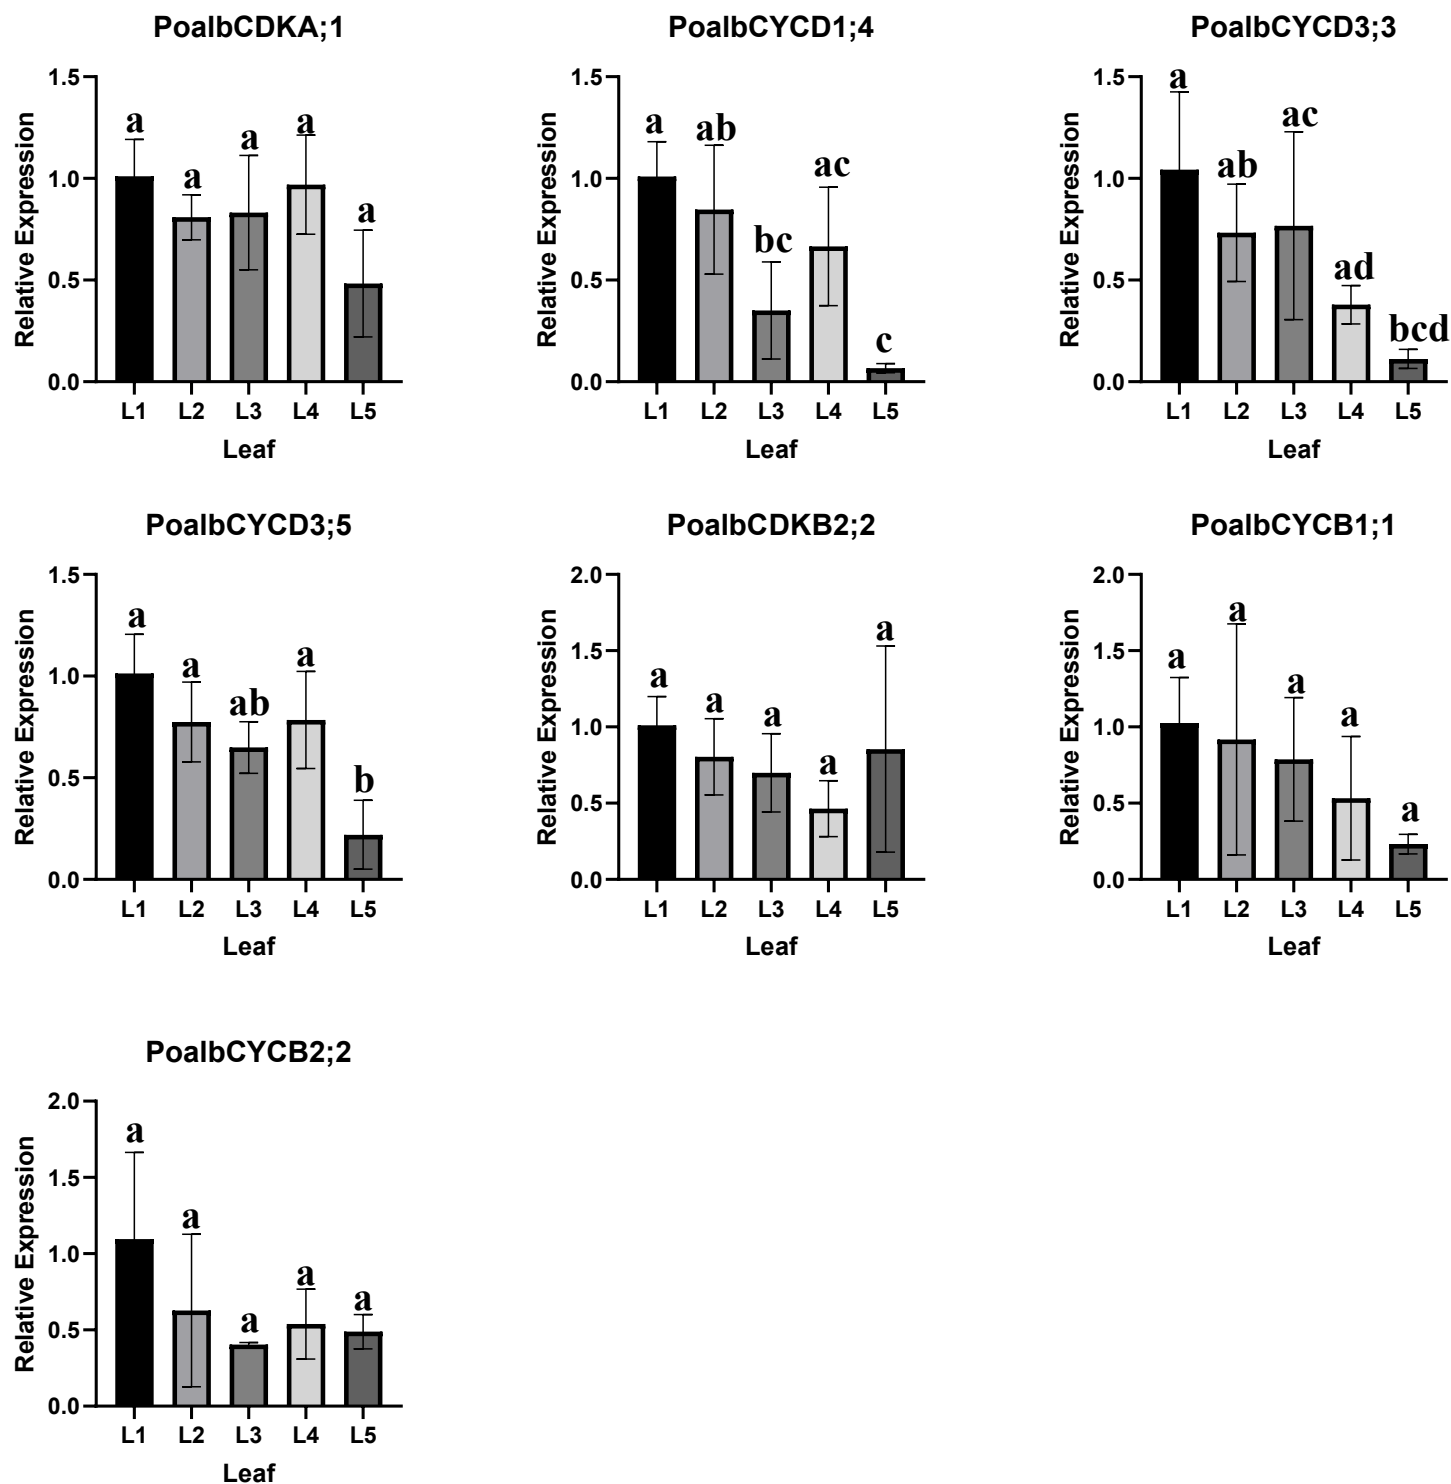

**Figure S13.** The expression analysis of cyclin and CDK genes by qRT-PCR. The error bars indicated standard deviation (SD). Significant difference using ANOVA by Tukey test ( $P < 0.05$ ).
