# Supplementary figures and images for: Study on the Interactions of Cyclins with CDKs Involved in Auxin Signal during Leaf Development by WGCNA in Populus alba
Source: MDPI journal article supplement (doi:10.3390/ijms241713445), 2023-08-30

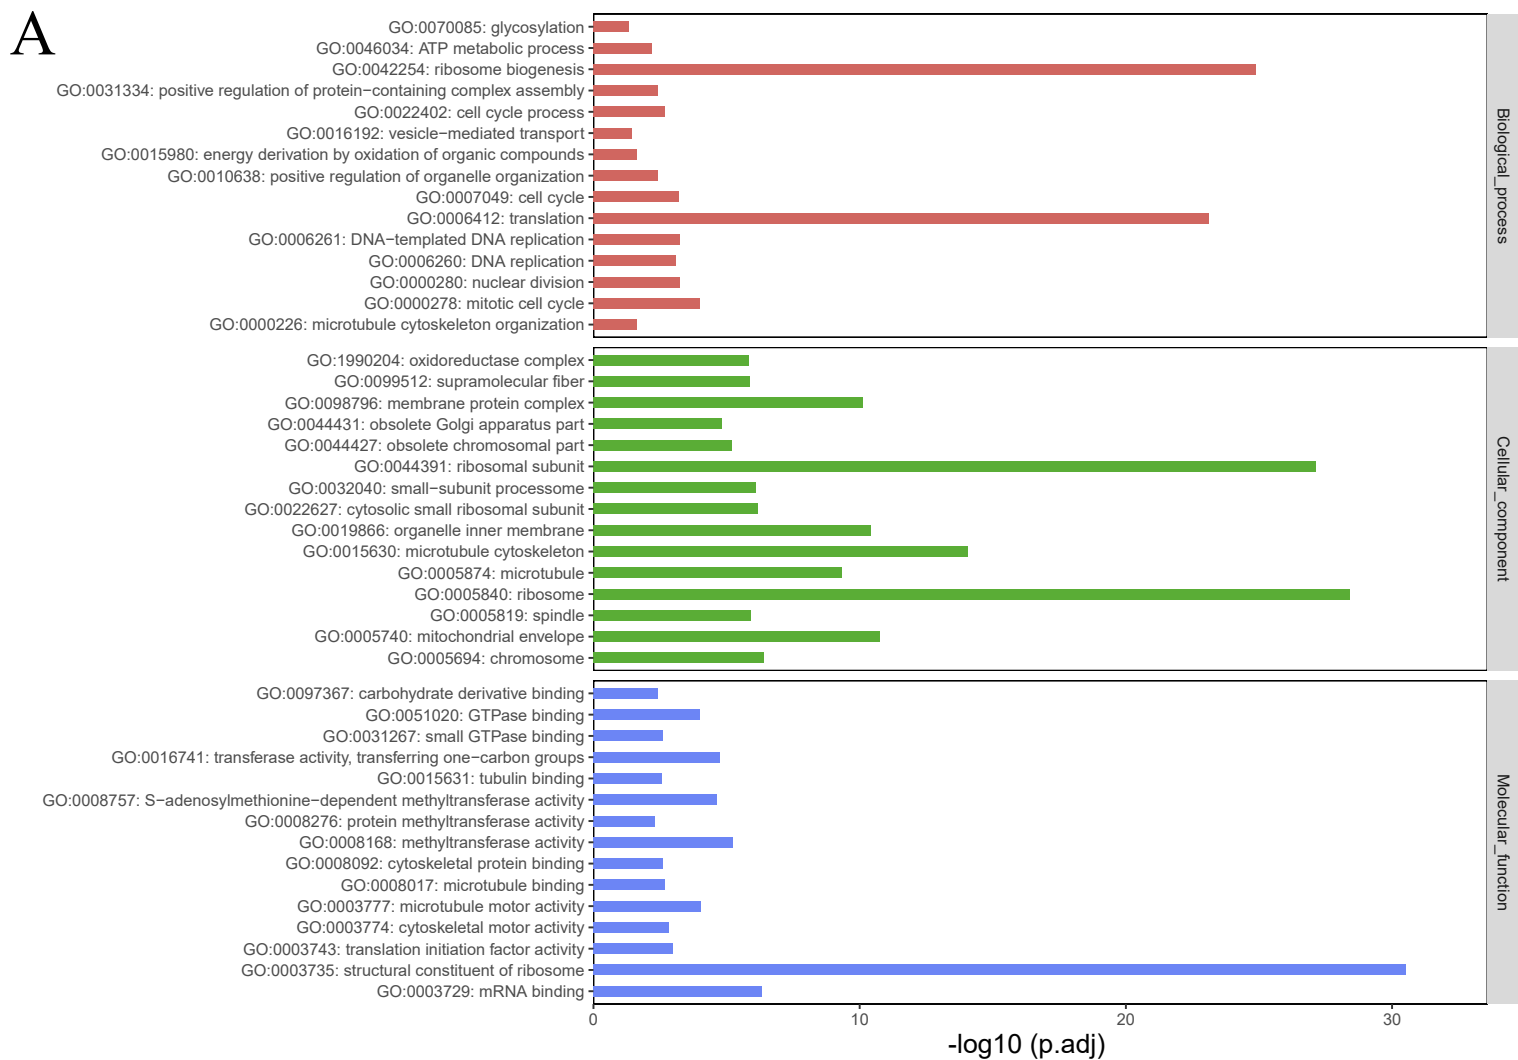

**B**

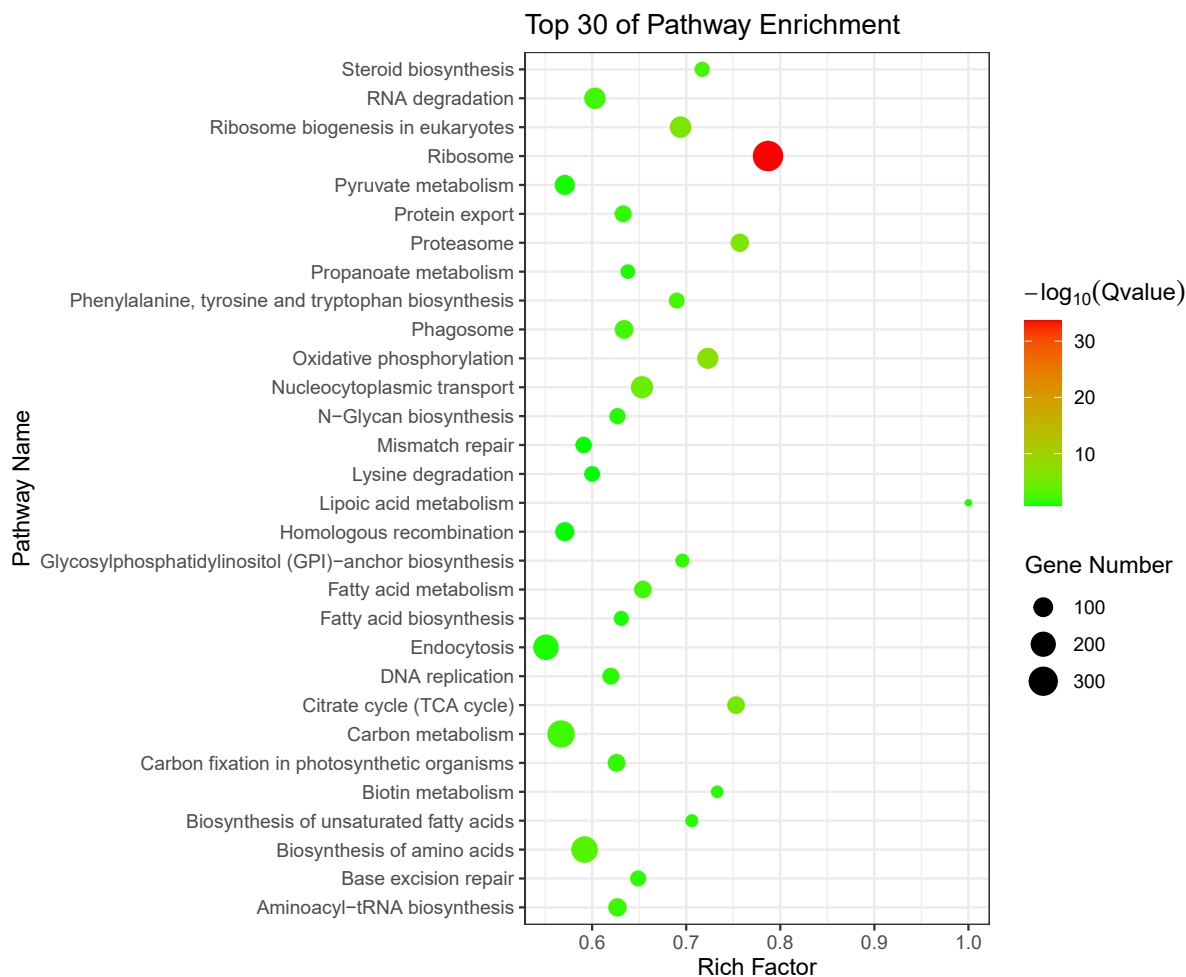

**Figure S11. GO and KEGG enrichment of turquoise module.**  
**A** GO plot. **B** KEGG plot.

Supplement: s1 [file s1]

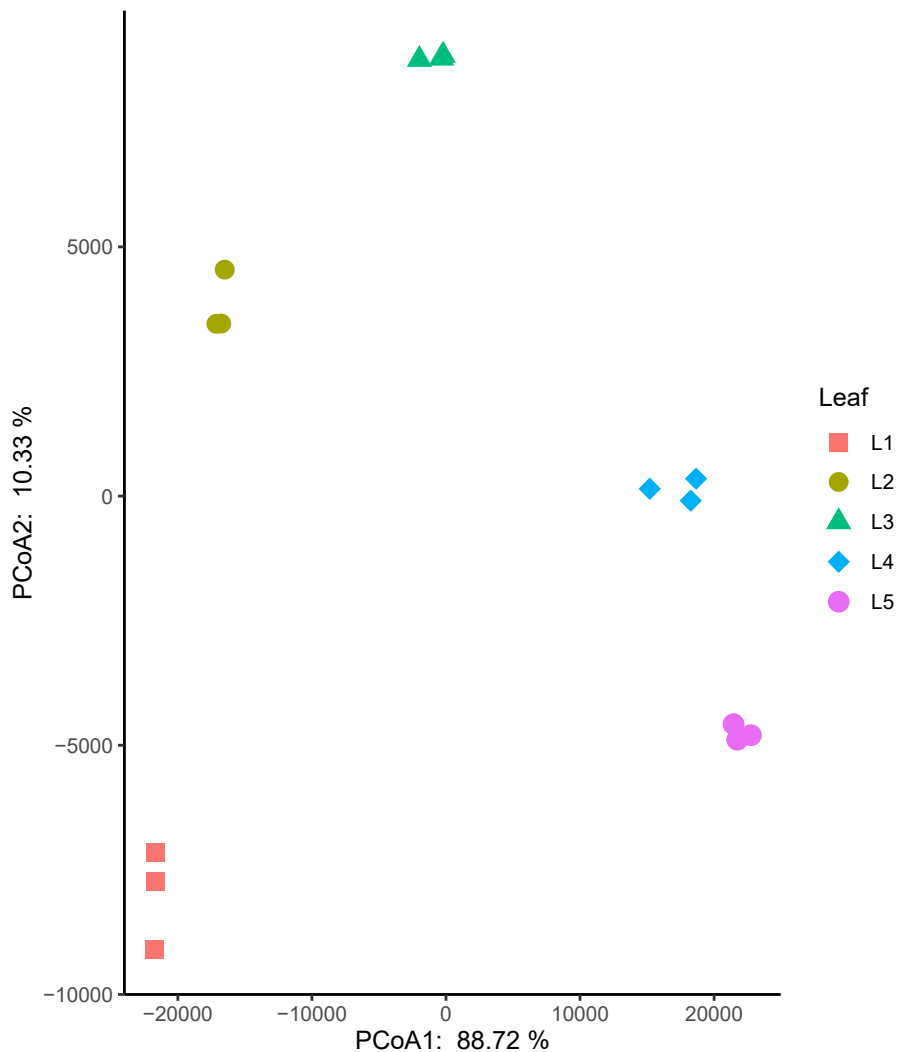

**Figure S10.** PCoA analysis of transcriptome

Supplement: s1 [file s1]

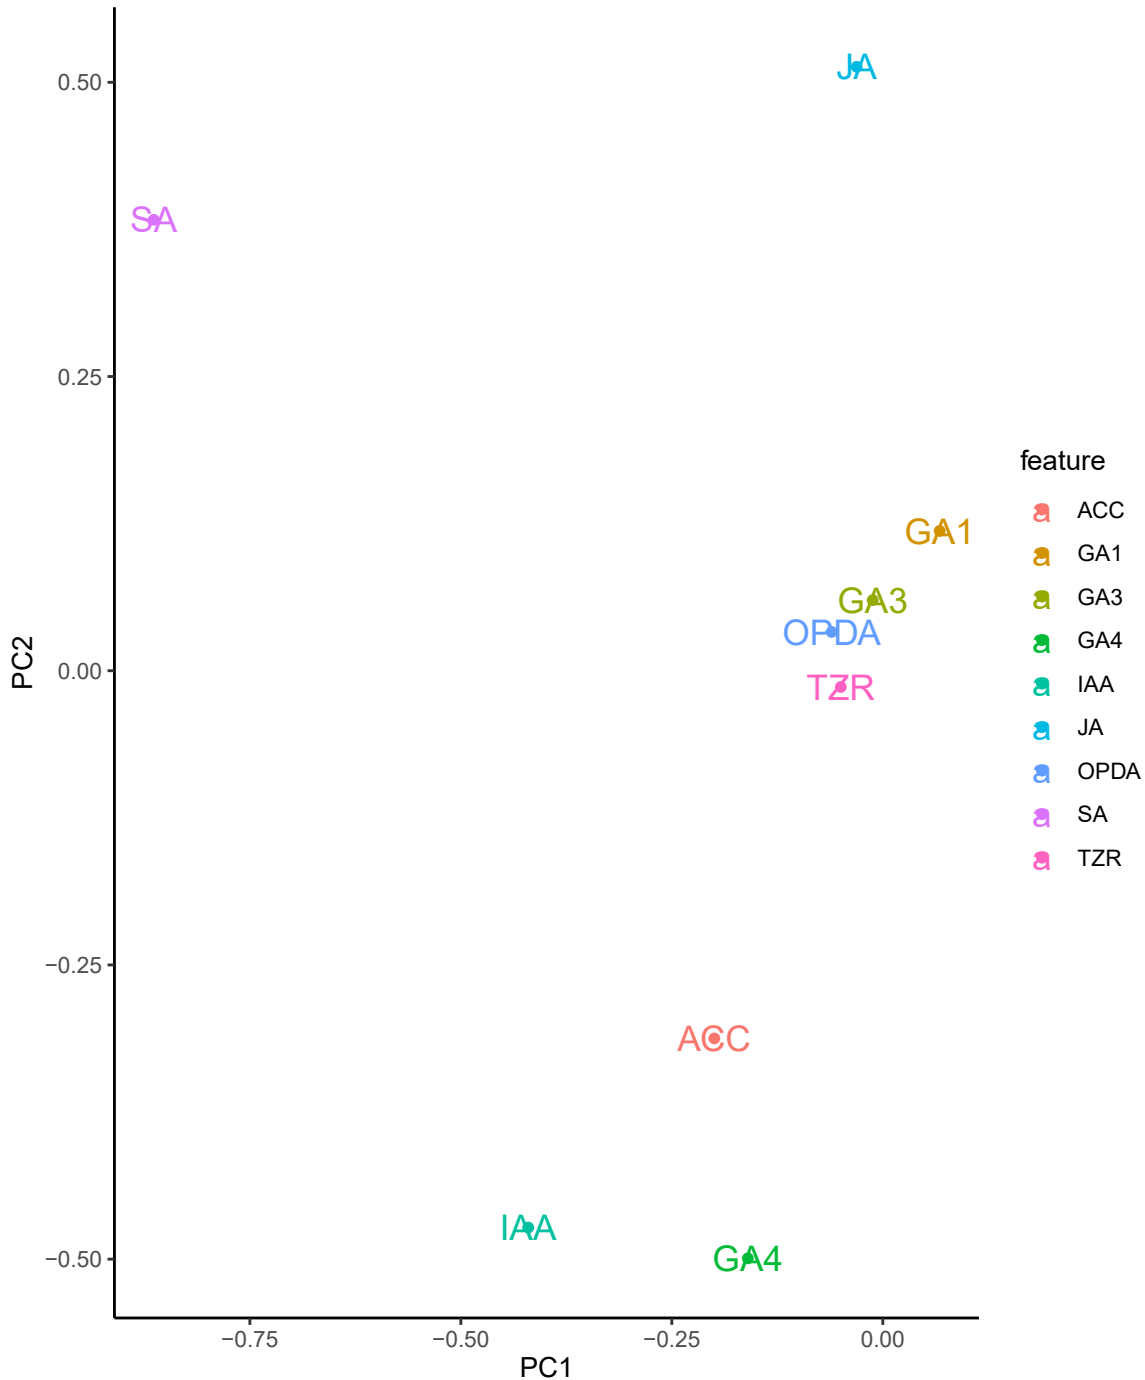

**Figure S9.** Contribution of PCA analysis

Supplement: s1 [file s1]

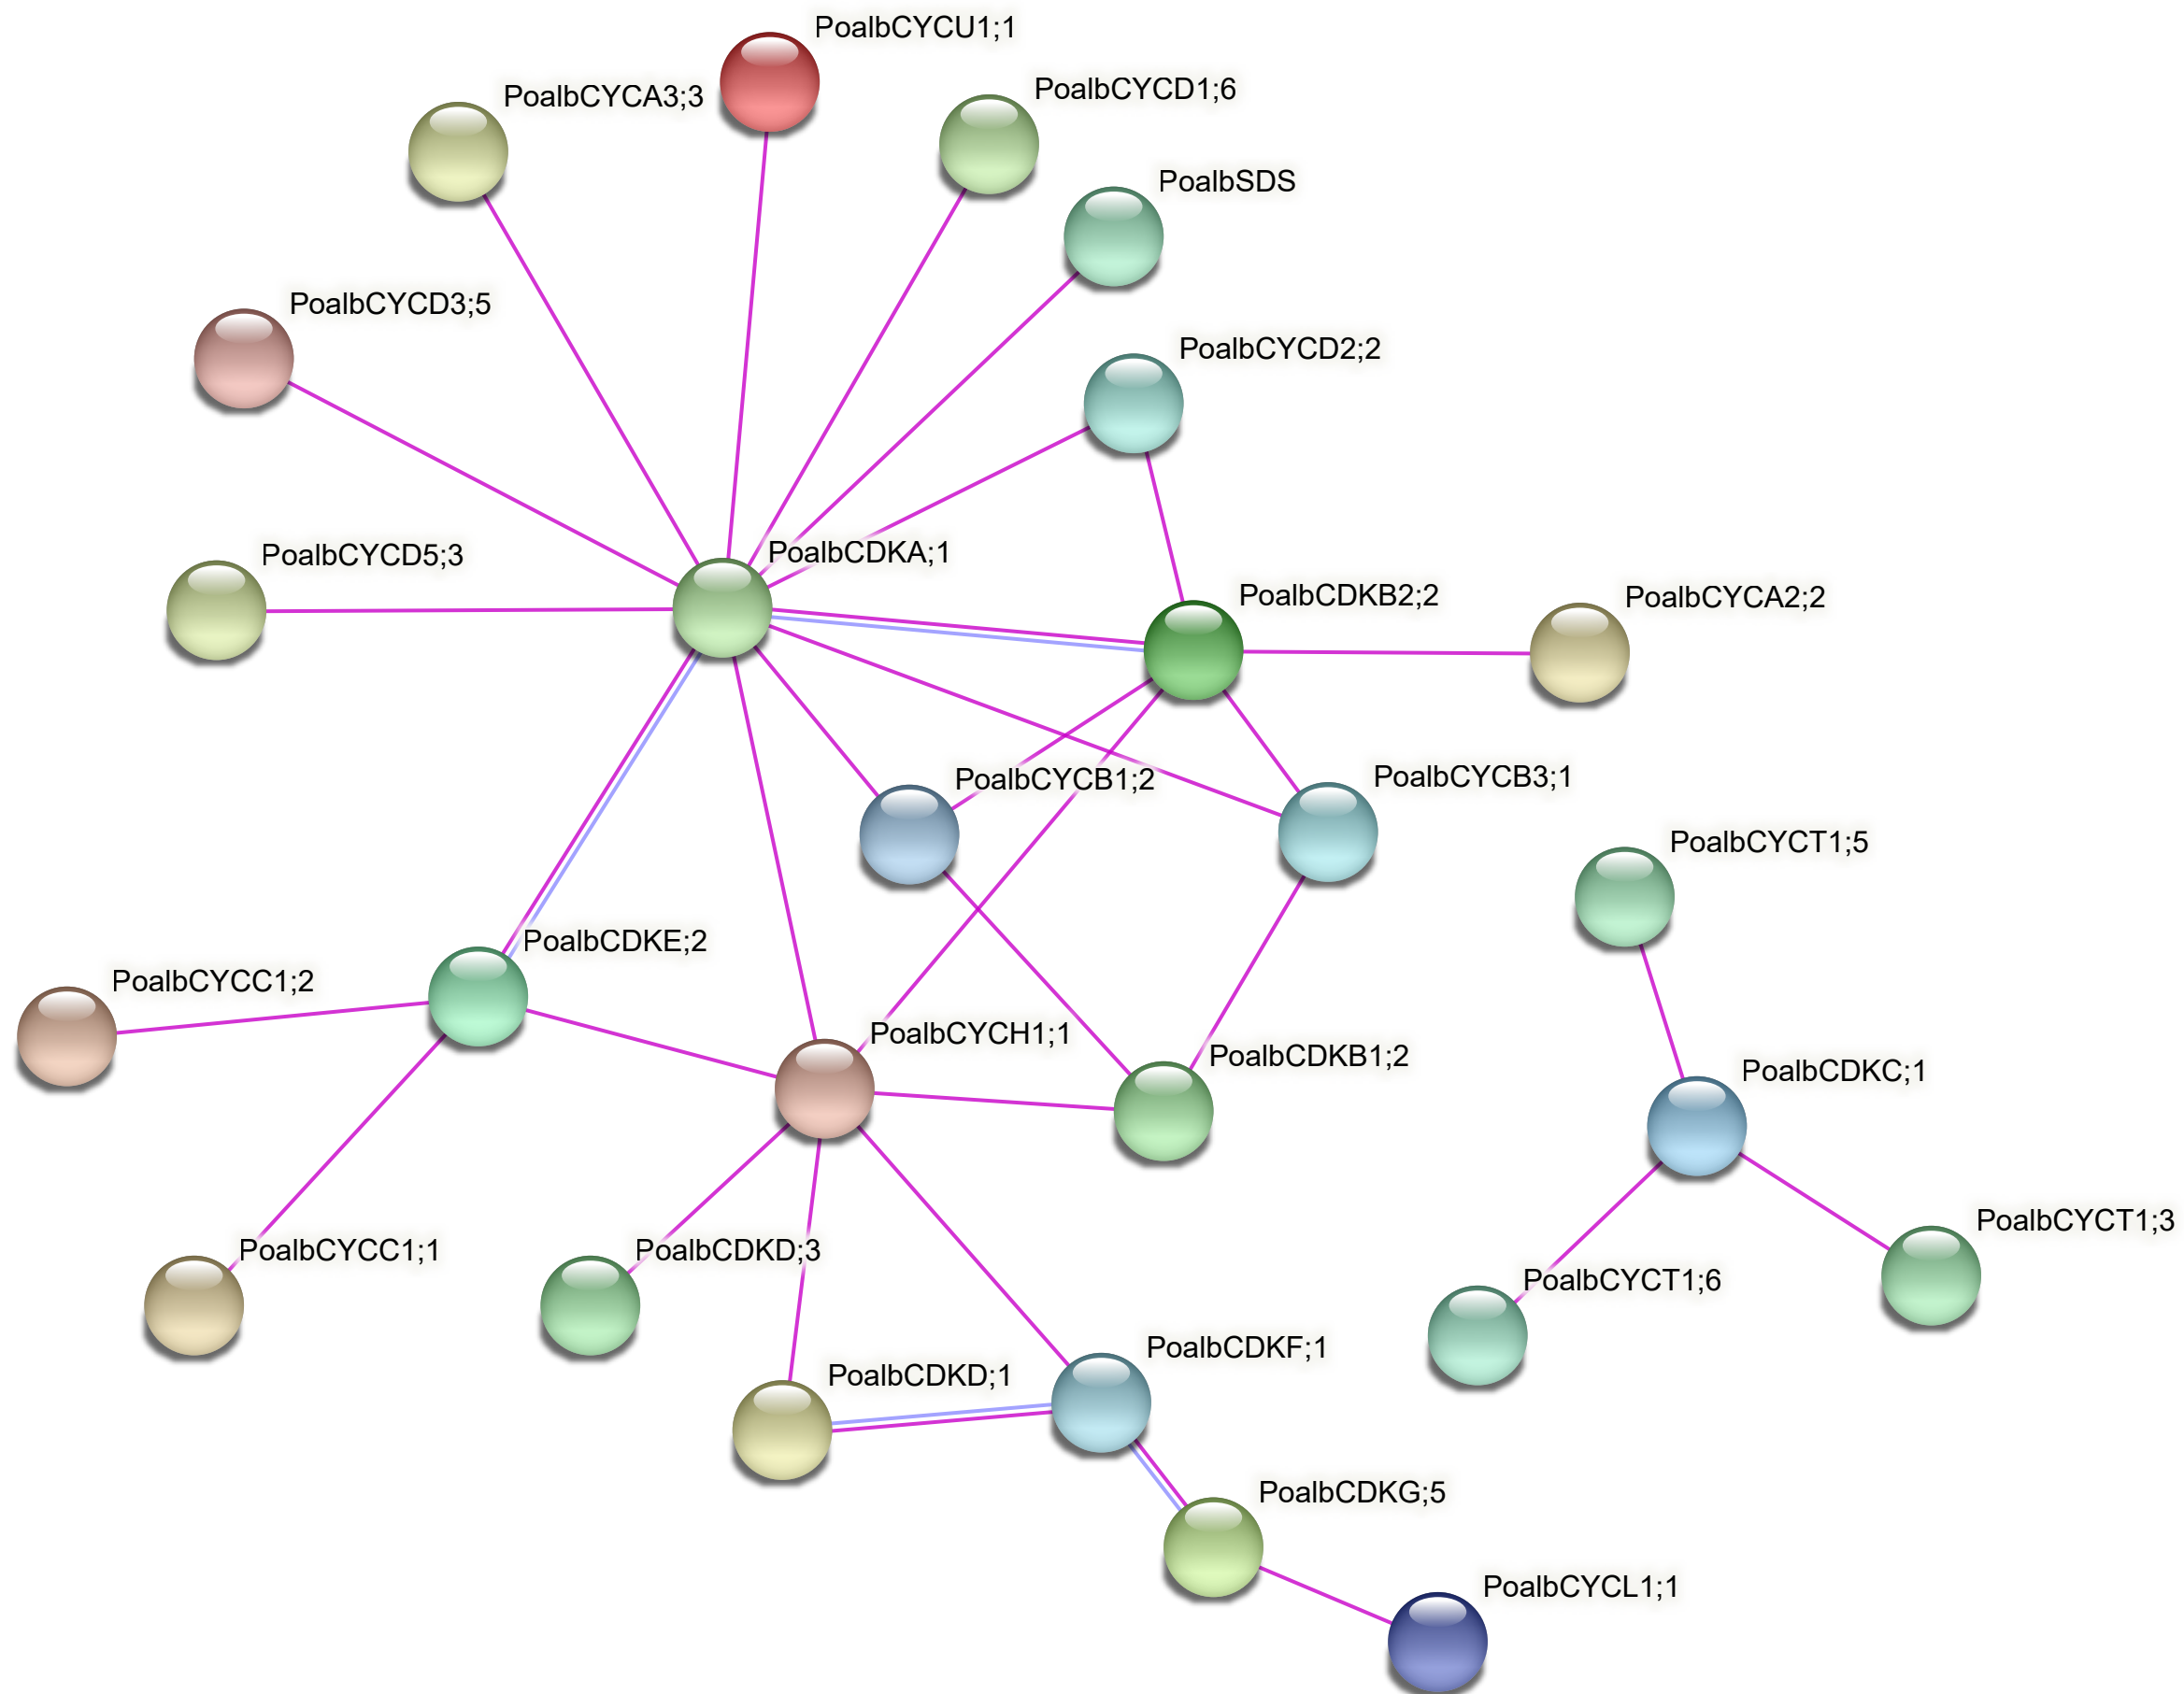

**Figure S4.** The interaction network of cyclins and CDKs

Supplement: s1 [file s1]

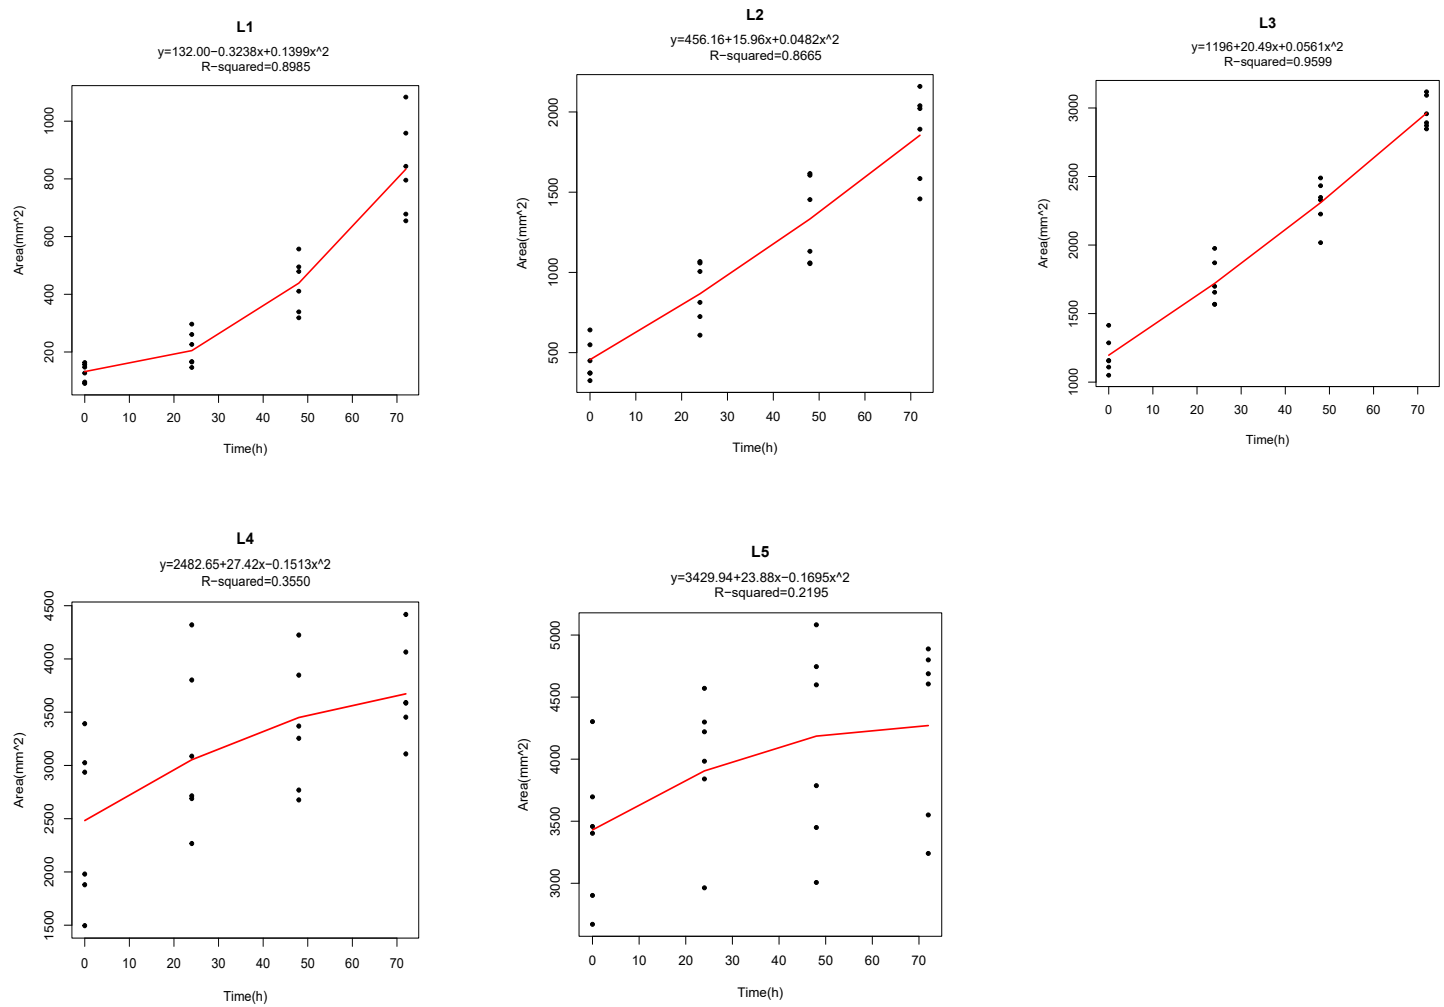

**Figure S6.** Univariate binomial fitting curve. The R-squared indicated the explained data.

Supplement: s1 [file s1]

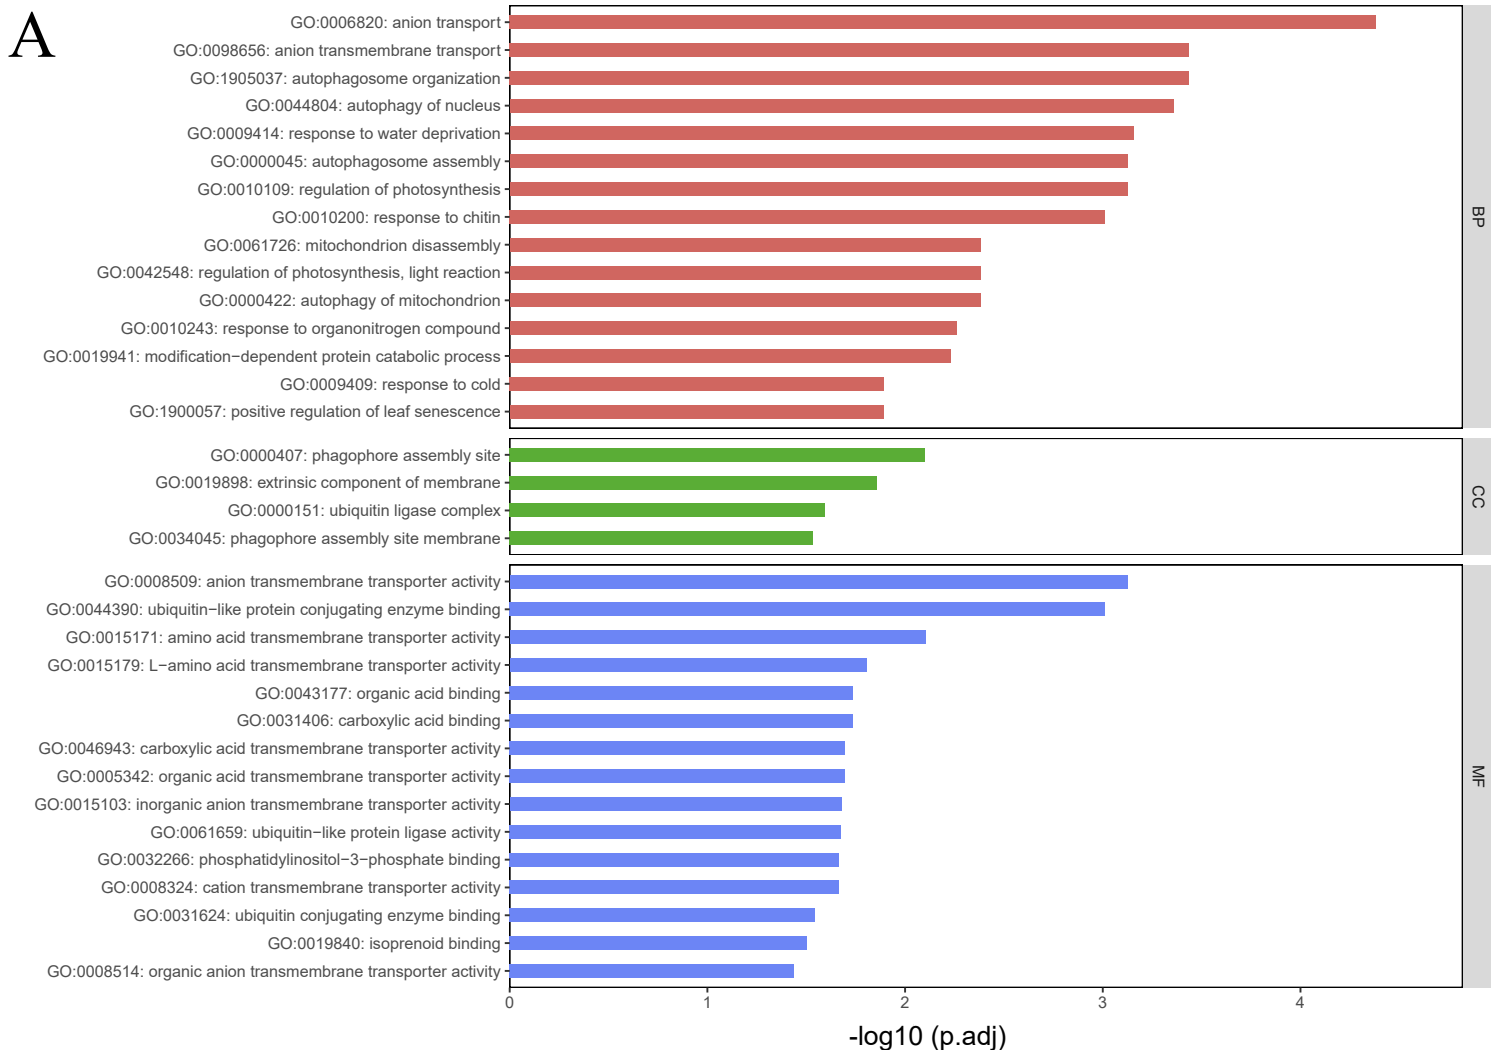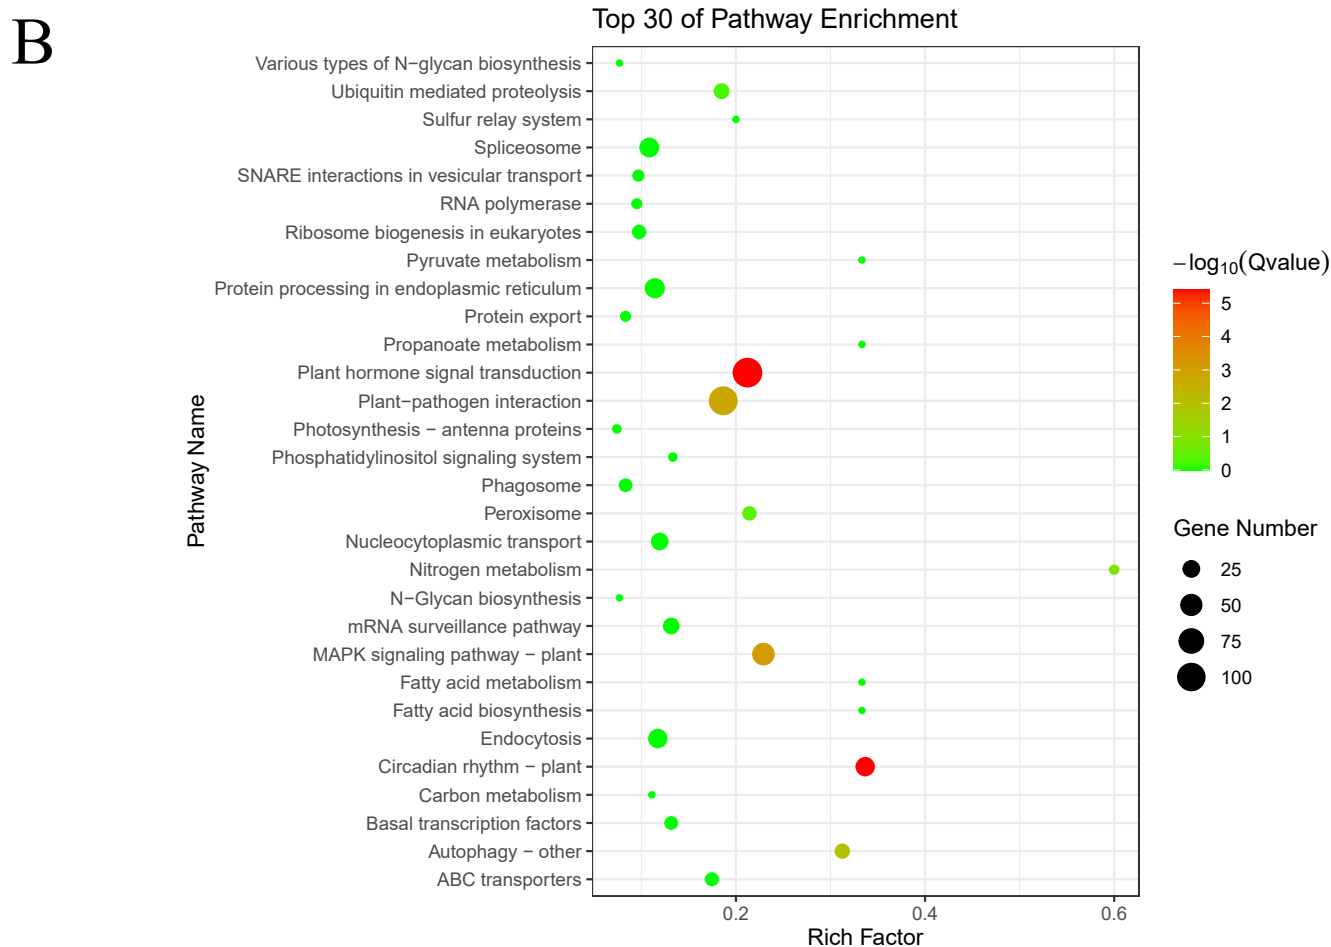

**Figure S12. GO and KEGG enrichment of blue module.**  
**A** GO plot. **B** KEGG plot

Supplement: s1 [file s1]

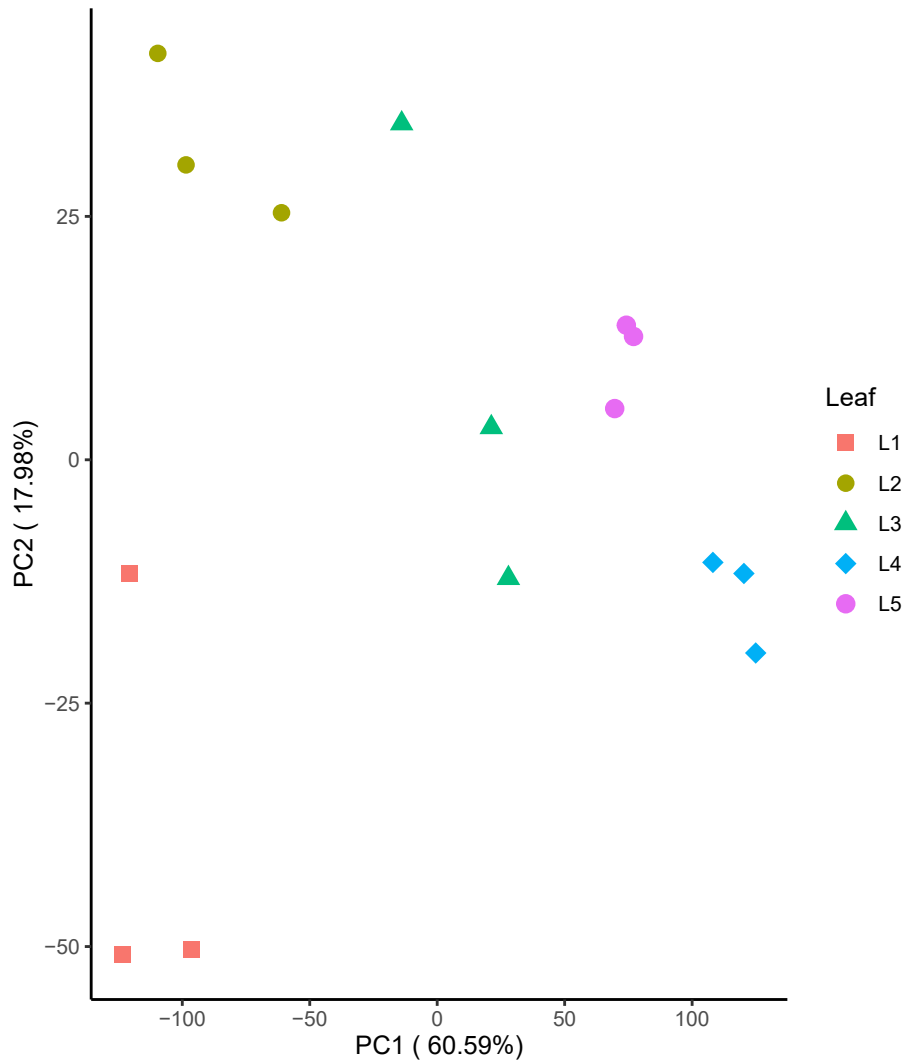

**Figure S8.** PCA analysis of hormones

Supplement: s1 [file s1]
